# Supplementary material for: Mortality due to traumatic spinal cord injuries in Europe: a cross-sectional and pooled analysis of population-wide data from 22 countries
Source: Springer Nature journal article supplement (doi:10.1186/s13049-017-0410-0), 2017-07-03
Supplement: MOESM1 [file 12672902]

# Traumatic spinal cord injury-related deaths in Europe: a cross-sectional and pooled analysis of population-wide data from 22 countries

## Authors:

Marek Majdan<sup>1,2</sup>, Dominika Plancikova<sup>1</sup>, Eva Nemcovska<sup>1</sup>, Lenka Krajcovicova<sup>1</sup>, Alexandra Brazinova<sup>1,2</sup>, Martin Rusnak<sup>1</sup>

## Affiliations:

**1:** Trnava University, Faculty of Health Sciences and Social Work, Department of Public Health, Univerzitne namestie 1, 91701 Trnava, Slovakia, Tel: +421-33-5939495 (206), Fax: +421-33-5939555

**2:** International Neurotrauma Research Organization, Moelkergasse 4, Vienna, Austria

## Corresponding Author

**Dr. Marek Majdan, PhD**

Trnava University

Faculty of Health Sciences and Social Work

Department of Public Health

Univerzitne namestie 1

91701 Trnava

Slovakia

Tel: +421-33-5939495 (206)

Fax: +421-33-5939555

[mmajdan@truni.sk](mailto:mmajdan@truni.sk), [majdan@email.com](mailto:majdan@email.com)

**Table S1. Crude and age-standardized TSCI-related mortality rates per million person years by country and age groups (total)**

| Sex            | Country        | 0 to 4 | 5 to 14 | 15 to 24 | 25 to 44 | 45 to 64 | 65 +  | Crude Rate       | Age-Standardized Rate (95% CI) |
|----------------|----------------|--------|---------|----------|----------|----------|-------|------------------|--------------------------------|
| Total          | Austria        | 0      | 0       | 1.0      | 0        | 3.8      | 33.1  | 7.1              | 7.6 (5.8 to 9.8)               |
|                | Belgium        | 0      | 0       | 0        | 1.7      | 2.7      | 23.7  | 5.3              | 5.8 (4.4 to 7.5)               |
|                | Croatia        | 0      | 0       | 0        | 1.7      | 3.3      | 40.3  | 8.7              | 9.2 (6.5 to 12.7)              |
|                | Cyprus         | 0      | 0       | 0        | 0        | 0        | 8.9   | 1.2              | 1.7 (0.0 to 9.7)               |
|                | Czech Republic | 0      | 0       | 2.5      | 3.4      | 3.5      | 42.1  | 9.2              | 10.3 (8.4 to 12.6)             |
|                | Denmark        | 0      | 0       | 1.4      | 4.2      | 3.3      | 19.3  | 5.5              | 5.9 (4.0 to 8.4)               |
|                | Estonia        | 0      | 0       | 0        | 5.4      | 2.9      | 8.5   | 3.8              | 3.8 (1.2 to 9.1)               |
|                | Finland        | 0      | 0       | 3.0      | 6.7      | 9.2      | 86.1  | 20.5             | 21.4 (17.6 to 25.7)            |
|                | Germany        | 0.3    | 0       | 0.9      | 0.9      | 2.0      | 25.5  | 6.2              | 5.9 (5.4 to 6.4)               |
|                | Ireland        | 0      | 0       | 1.8      | 1.4      | 2.8      | 14.5  | 3.1              | 4.2 (2.2 to 7.1)               |
|                | Italy          | 0.4    | 0       | 0.7      | 0.8      | 1.1      | 19.7  | 4.7              | 4.4 (3.9 to 5.0)               |
|                | Latvia         | 0      | 0       | 0        | 1.8      | 7.2      | 2.6   | 2.9              | 2.9 (1.1 to 6.5)               |
|                | Lithuania      | 0      | 0       | 12.2     | 7.7      | 12.2     | 20.3  | 10.7             | 10.6 (7.3 to 15.1)             |
|                | Netherlands    | 0      | 0       | 0        | 0        | 1.5      | 15.5  | 3.0              | 3.4 (2.5 to 4.5)               |
|                | Portugal       | 0      | 0       | 0        | 0.3      | 3.5      | 6.9   | 2.4              | 2.4 (1.5 to 3.5)               |
|                | Romania        | 0      | 0.5     | 2.9      | 2.1      | 9.1      | 15.4  | 5.9              | 6.4 (5.3 to 7.6)               |
|                | Slovakia       | 0      | 0       | 2.8      | 0.6      | 4.8      | 25.7  | 5.2              | 6.8 (4.4 to 9.9)               |
|                | Slovenia       | 0      | 0       | 0        | 3.3      | 3.4      | 45.9  | 9.7              | 10.7 (6.5 to 16.7)             |
|                | Sweden         | 0      | 0       | 0.8      | 2.0      | 3.7      | 33.2  | 7.9              | 8.1 (6.4 to 10.1)              |
|                | Switzerland    | 0      | 0       | 0        | 0.9      | 1.8      | 62.2  | 11.5             | 12.9 (10.4 to 15.8)            |
| Turkey         | 0              | 0      | 0       | 0.2      | 0.5      | 4.1      | 0.5   | 1.0 (0.7 to 1.4) |                                |
| United Kingdom | 0              | 0      | 0       | 0.2      | 0.7      | 12.8     | 2.4   | 2.7 (2.3 to 3.2) |                                |
| Males          | Austria        | 0      | 0       | 1.9      | 0        | 5.1      | 36.2  | 7.3              | 8.6 (5.8 to 12.4)              |
|                | Belgium        | 0      | 0       | 0        | 3.3      | 4.0      | 25.3  | 5.9              | 6.9 (4.7 to 9.8)               |
|                | Croatia        | 0      | 0       | 0        | 3.4      | 6.7      | 43.1  | 9.2              | 11.1 (6.6 to 17.5)             |
|                | Cyprus         | 0      | 0       | 0        | 0        | 0        | 19.4  | 2.4              | 3.8 (0.1 to 21.1)              |
|                | Czech Republic | 0      | 0       | 1.6      | 5.5      | 6.4      | 53.7  | 11.0             | 13.8 (10.4 to 18.0)            |
|                | Denmark        | 0      | 0       | 2.7      | 7.0      | 5.3      | 24.8  | 7.6              | 8.4 (5.2 to 13.0)              |
|                | Estonia        | 0      | 0       | 0        | 10.6     | 0        | 12.7  | 4.9              | 5.3 (1.0 to 17.4)              |
|                | Finland        | 0      | 0       | 3.0      | 11.6     | 13.2     | 118.6 | 25.9             | 30.0 (23.3 to 38.1)            |
|                | Germany        | 0      | 0       | 1.5      | 1.6      | 3.4      | 30.2  | 7.1              | 7.4 (6.5 to 8.3)               |
|                | Ireland        | 0      | 0       | 3.6      | 2.8      | 5.7      | 19.7  | 4.8              | 6.5 (3.2 to 12.2)              |
|                | Italy          | 0.7    | 0       | 1.0      | 1.2      | 1.9      | 23.3  | 5.3              | 5.5 (4.7 to 6.5)               |
|                | Latvia         | 0      | 0       | 0        | 3.6      | 12.0     | 0     | 4.3              | 4.1 (1.1 to 11.9)              |
|                | Lithuania      | 0      | 0       | 14.3     | 13.0     | 24.2     | 38.3  | 17.4             | 19.0 (12.0 to 28.8)            |
|                | Netherlands    | 0      | 0       | 0        | 0        | 2.5      | 17.0  | 3.3              | 4.0 (2.6 to 5.8)               |
|                | Portugal       | 0      | 0       | 0        | 0.7      | 4.4      | 10.8  | 3.2              | 3.5 (2.0 to 5.6)               |
|                | Romania        | 0      | 0       | 4.8      | 3.2      | 16.0     | 28.3  | 9.5              | 11.2 (9.0 to 13.8)             |
|                | Slovakia       | 0      | 0       | 5.5      | 1.2      | 7.0      | 37.8  | 6.8              | 10.2 (5.8 to 16.7)             |
|                | Slovenia       | 0      | 0       | 0        | 6.4      | 6.6      | 64.5  | 12.8             | 16.0 (8.4 to 27.9)             |
|                | Sweden         | 0      | 0       | 1.6      | 1.6      | 6.6      | 41.6  | 9.5              | 10.4 (7.6 to 14.0)             |
|                | Switzerland    | 0      | 0       | 0        | 1.8      | 3.6      | 80.1  | 13.7             | 17.0 (12.8 to 22.3)            |
| Turkey         | 0              | 0      | 0       | 0.2      | 0.8      | 6.2      | 0.6   | 1.5 (0.9 to 2.3) |                                |
| United Kingdom | 0              | 0      | 0       | 0.4      | 1.1      | 15.3     | 2.7   | 3.4 (2.7 to 4.2) |                                |
| Females        | Austria        | 0      | 0       | 0        | 0        | 2.5      | 30.8  | 6.9              | 6.7 (4.5 to 9.6)               |
|                | Belgium        | 0      | 0       | 0        | 0        | 1.3      | 22.5  | 4.8              | 4.7 (3.1 to 6.9)               |
|                | Croatia        | 0      | 0       | 0        | 0        | 0        | 38.5  | 8.1              | 7.5 (4.4 to 12.0)              |
|                | Cyprus         | 0      | 0       | 0        | 0        | 0        | 0     | 0                | 0                              |
|                | Czech Republic | 0      | 0       | 3.4      | 1.3      | 0.7      | 34.1  | 7.5              | 7.6 (5.4 to 10.4)              |
|                | Denmark        | 0      | 0       | 0        | 1.4      | 1.3      | 14.8  | 3.5              | 3.6 (1.7 to 6.7)               |
|                | Estonia        | 0      | 0       | 0        | 0        | 5.3      | 6.3   | 2.8              | 2.6 (0.3 to 10.7)              |
|                | Finland        | 0      | 0       | 3.1      | 1.5      | 5.2      | 62.4  | 15.2             | 14.3 (10.3 to 19.4)            |
|                | Germany        | 0.6    | 0       | 0.2      | 0.2      | 0.7      | 22.0  | 5.4              | 4.6 (4.0 to 5.2)               |
|                | Ireland        | 0      | 0       | 0        | 0        | 0        | 10.0  | 1.3              | 2.0 (0.4 to 5.7)               |
|                | Italy          | 0      | 0       | 0.3      | 0.4      | 0.4      | 17.0  | 4.2              | 3.5 (3.0 to 4.2)               |
|                | Latvia         | 0      | 0       | 0        | 0        | 3.3      | 3.9   | 1.8              | 1.6 (0.2 to 6.9)               |
|                | Lithuania      | 0      | 0       | 10.0     | 2.5      | 2.3      | 11.1  | 5.0              | 4.6 (2.0 to 9.4)               |
|                | Netherlands    | 0      | 0       | 0        | 0        | 0.4      | 14.3  | 2.7              | 2.9 (1.8 to 4.4)               |
|                | Portugal       | 0      | 0       | 0        | 0        | 2.7      | 4.2   | 1.6              | 1.5 (0.7 to 3.0)               |
|                | Romania        | 0      | 1.0     | 0.9      | 1.0      | 2.6      | 6.7   | 2.4              | 2.5 (1.6 to 3.7)               |
|                | Slovakia       | 0      | 0       | 0        | 0        | 2.7      | 18.4  | 3.6              | 4.3 (2.0 to 7.9)               |
|                | Slovenia       | 0      | 0       | 0        | 0        | 0        | 33.5  | 6.7              | 6.5 (2.6 to 14.0)              |
|                | Sweden         | 0      | 0       | 0        | 1.7      | 0.8      | 26.3  | 6.1              | 5.8 (3.9 to 8.3)               |
|                | Switzerland    | 0      | 0       | 0        | 0        | 0        | 48.5  | 9.4              | 9.5 (6.7 to 13.0)              |
| Turkey         | 0              | 0      | 0       | 0.2      | 0.3      | 2.5      | 0.3   | 0.6 (0.3 to 1.1) |                                |
| United Kingdom | 0              | 0      | 0       | 0        | 0.4      | 10.7     | 2.1   | 2.2 (1.7 to 2.8) |                                |

CI: Confidence Interval;

**Table S2. Rate ratios of TSCI-related mortality rates per million person years by country and age groups with 95% CI by sex**

| Sex            | Country        | 0 - 4           | 5 - 14          | 15 - 24           | 25 - 44          | 45 - 64             | 65+                 |
|----------------|----------------|-----------------|-----------------|-------------------|------------------|---------------------|---------------------|
| Males          | Austria        | -               | -               | 0.4 (0.0 - 2.5)   | -                | Reference           | 6.9 (3.0 - 18.9)    |
|                | Belgium        | -               | -               | -                 | 0.8 (0.2 - 2.9)  | Reference           | 6.2 (2.6 - 17.1)    |
|                | Croatia        | -               | -               | -                 | 0.5 (0.1 - 2.9)  | Reference           | 6.2 (2.2 - 22.7)    |
|                | Cyprus         | -               | -               | -                 | -                | -                   | 19.4*               |
|                | Czech Republic | -               | -               | 0.3 (0.0 - 1.6)   | 0.8 (0.3 - 2.2)  | Reference           | 8.2 (4.2 - 18.3)    |
|                | Denmark        | -               | -               | 0.6 (0.0 - 4.1)   | 1.3 (0.3 - 5.5)  | Reference           | 4.5 (1.5 - 16.9)    |
|                | Estonia        | -               | -               | -                 | Reference        | -                   | 1.3 (0.0 - 15.7)    |
|                | Finland        | -               | -               | 0.3 (0.0 - 1.3)   | 0.9 (0.3 - 2.3)  | Reference           | 8.9 (4.7 - 18.6)    |
|                | Germany        | -               | -               | 0.5 (0.2 - 1.0)   | 0.5 (0.3 - 0.8)  | Reference           | 8.9 (6.5 - 12.6)    |
|                | Ireland        | -               | -               | 0.7 (0.0 - 5.9)   | 0.5 (0.1 - 3.4)  | Reference           | 3.4 (0.8 - 17.6)    |
|                | Italy          | 0.4 (0.0 - 2.1) | -               | 0.6 (0.1 - 1.7)   | 0.7 (0.3 - 1.5)  | Reference           | 12.4 (7.5 - 22.1)   |
|                | Latvia         | -               | -               | -                 | 0.3 (0.0 - 2.8)  | Reference           | -                   |
|                | Lithuania      | -               | -               | 0.6 (0.1 - 2.1)   | 0.5 (0.2 - 1.6)  | Reference           | 1.6 (0.6 - 4.3)     |
|                | Netherlands    | -               | -               | -                 | -                | Reference           | 6.6 (2.8 - 18.1)    |
|                | Portugal       | -               | -               | -                 | 0.2 (0.0 - 1.1)  | Reference           | 2.4 (0.9 - 7.3)     |
|                | Romania        | -               | -               | 0.3 (0.1 - 0.7)   | 0.2 (0.1 - 0.4)  | Reference           | 1.8 (1.1 - 2.8)     |
|                | Slovakia       | -               | -               | 0.8 (0.1 - 3.9)   | 0.2 (0.0 - 1.2)  | Reference           | 5.3 (1.8 - 17.4)    |
|                | Slovenia       | -               | -               | -                 | 1.0 (0.1 - 9.3)  | Reference           | 9.2 (2.3 - 65.9)    |
|                | Sweden         | -               | -               | 0.3 (0.0 - 1.5)   | 0.3 (0.0 - 1.1)  | Reference           | 6.2 (3.0 - 14.6)    |
|                | Switzerland    | -               | -               | -                 | 0.5 (0.1 - 2.8)  | Reference           | 21.6 (8.8 - 72.9)   |
| Turkey         | -              | -               | -               | 0.2 (0.0 - 1.0)   | Reference        | 7.4 (3.0 - 21.1)    |                     |
| United Kingdom | -              | -               | -               | 0.3 (0.1 - 1.1)   | Reference        | 13.4 (7.1 - 29.0)   |                     |
| Females        | Austria        | -               | -               | -                 | -                | Reference           | 11.7 (4.1 - 50.7)   |
|                | Belgium        | -               | -               | -                 | -                | Reference           | 15.7 (4.7 - 105.2)  |
|                | Croatia        | -               | -               | -                 | -                | -                   | 38.5*               |
|                | Cyprus         | -               | -               | -                 | -                | -                   | -                   |
|                | Czech Republic | -               | -               | 4.6 (0.4 - 144.9) | 1.7 (0.1 - 54.1) | Reference           | 42.7 (9.4 - 999.7)  |
|                | Denmark        | -               | -               | -                 | 1.1 (0.0 - 41.3) | Reference           | 9.8 (1.8 - 245.8)   |
|                | Estonia        | -               | -               | -                 | -                | Reference           | 1.2 (0.0 - 46.6)    |
|                | Finland        | -               | -               | 0.7 (0.0 - 4.7)   | 0.3 (0.0 - 2.3)  | Reference           | 11.5 (4.6 - 39.3)   |
|                | Germany        | 1.0 (0.0 - 5.7) | -               | 0.4 (0.0 - 2.1)   | 0.3 (0.0 - 1.3)  | Reference           | 32.5 (17.2 - 72.2)  |
|                | Ireland        | -               | -               | -                 | -                | -                   | 10.0*               |
|                | Italy          | -               | -               | 1.1 (0.0 - 9.1)   | 1.0 (0.2 - 6.0)  | Reference           | 45.3 (17.2 - 190.2) |
|                | Latvia         | -               | -               | -                 | -                | Reference           | 1.2 (0.0 - 45.9)    |
|                | Lithuania      | -               | -               | 4.2 (0.3 - 131.2) | 1.1 (0.0 - 44.0) | Reference           | 4.5 (0.6 - 122.0)   |
|                | Netherlands    | -               | -               | -                 | -                | Reference           | 29.4 (6.2 - 697.6)  |
|                | Portugal       | -               | -               | -                 | -                | Reference           | 1.6 (0.4 - 6.5)     |
|                | Romania        | -               | 0.4 (0.0 - 2.4) | 0.4 (0.0 - 2.1)   | 0.4 (0.1 - 1.5)  | Reference           | 2.5 (1.0 - 6.8)     |
|                | Slovakia       | -               | -               | -                 | -                | Reference           | 6.5 (1.6 - 47.6)    |
|                | Slovenia       | -               | -               | -                 | -                | -                   | 33.5*               |
|                | Sweden         | -               | -               | -                 | 1.9 (0.2 - 58.9) | Reference           | 27.7 (6.0 - 655.1)  |
|                | Switzerland    | -               | -               | -                 | -                | -                   | 48.5*               |
| Turkey         | -              | -               | -               | 0.6 (0.1 - 6.2)   | Reference        | 8.9 (2.2 - 64.8)    |                     |
| United Kingdom | -              | -               | -               | -                 | Reference        | 27.9 (10.4 - 117.8) |                     |

\* Crude rates, rate ratios could not be calculated

**Table S3. Number of deaths\* and age-standardized mortality rates per million person years due to all injuries and TSCI with proportions of TSCI-related age-standardized mortalities and number of deaths, stratified by country and sex**

| Sex               | Country        | TSCI                     |                                | ALL INJURIES                  |                                | Percent TSCI MR/ All injury MR** (95% CI) |
|-------------------|----------------|--------------------------|--------------------------------|-------------------------------|--------------------------------|-------------------------------------------|
|                   |                | Number of deaths         | Age-standardized rate (95% CI) | Number of deaths              | Age-standardized rate (95% CI) |                                           |
| Males             | Austria        | 30                       | 8.6 (5.8 to 12.4)              | 1946                          | 522.1 (498.9 to 546.1)         | 1.7 (1.2 to 2.3)                          |
|                   | Belgium        | 32                       | 6.9 (4.7 to 9.8)               | 2056                          | 419.6 (401.4 to 438.3)         | 1.6 (1.2 to 2.2)                          |
|                   | Croatia        | 19                       | 11.1 (6.6 to 17.5)             | 1190                          | 644.9 (608.2 to 683.4)         | 1.7 (1.1 to 2.6)                          |
|                   | Cyprus         | 1                        | 3.8 (0.1 to 21.1)              | 143                           | 392.4 (328.0 to 466.6)         | 1.0 (0.0 to 4.5)                          |
|                   | Czech Republic | 57                       | 13.8 (10.4 to 18.0)            | 2318                          | 504.0 (438.2 to 525.6)         | 2.7 (2.2 to 3.4)                          |
|                   | Denmark        | 21                       | 8.4 (5.2 to 13.0)              | 612                           | 245.1 (226.0 to 265.5)         | 3.4 (2.3 to 4.9)                          |
|                   | Estonia        | 3                        | 5.3 (1.0 to 17.4)              | 284                           | 491.4 (434.5 to 554.4)         | 1.1 (0.2 to 3.1)                          |
|                   | Finland        | 69                       | 30.0 (23.3 to 38.1)            | 1194                          | 492.1 (464.3 to 521.1)         | 6.1 (5.0 to 7.3)                          |
|                   | Germany        | 285                      | 7.4 (6.5 to 8.3)               | 12009                         | 302.1 (296.7 to 307.6)         | 2.4 (2.2 to 2.7)                          |
|                   | Ireland        | 11                       | 6.5 (3.2 to 12.2)              | 372                           | 212.8 (190.8 to 236.7)         | 3.1 (1.7 to 5.1)                          |
|                   | Italy          | 153                      | 5.5 (4.7 to 6.5)               | 10277                         | 363.8 (356.8 to 370.9)         | 1.5 (1.3 to 1.7)                          |
|                   | Latvia         | 4                        | 4.1 (1.1 to 11.9)              | 548                           | 608.3 (557.4 to 663.0)         | 0.7 (0.2 to 1.8)                          |
|                   | Lithuania      | 24                       | 19.0 (12.0 to 28.8)            | 898                           | 697.7 (651.8 to 746.3)         | 2.7 (1.8 to 3.9)                          |
|                   | Netherlands    | 27                       | 4.0 (2.6 to 5.8)               | 2279                          | 319.8 (306.7 to 333.4)         | 1.2 (0.9 to 1.8)                          |
|                   | Portugal       | 16                       | 3.5 (2.0 to 5.6)               | 1818                          | 379.6 (362.3 to 397.6)         | 0.9 (0.5 to 1.4)                          |
|                   | Romania        | 93                       | 11.2 (9.0 to 13.8)             | 3824                          | 424.6 (410.9 to 438.6)         | 2.6 (2.2 to 3.1)                          |
|                   | Slovakia       | 18                       | 10.2 (5.8 to 16.7)             | 1371                          | 645.6 (609.4 to 683.6)         | 1.6 (1.0 to 2.4)                          |
|                   | Slovenia       | 13                       | 16.0 (8.4 to 27.9)             | 424                           | 483.7 (437.7 to 533.5)         | 3.3 (1.9 to 5.2)                          |
|                   | Sweden         | 45                       | 10.4 (7.6 to 14.0)             | 1521                          | 347.6 (330.3 to 365.6)         | 3.0 (2.3 to 3.8)                          |
|                   | Switzerland    | 54                       | 17.0 (12.8 to 22.3)            | 2218                          | 644.2 (617.4 to 672.0)         | 2.6 (2.1 to 3.3)                          |
| Turkey            | 23             | 1.5 (0.9 to 2.3)         | 7926                           | 306.3 (298.4 to 314.4)        | 0.5 (0.3 to 0.7)               |                                           |
| United Kingdom    | 86             | 3.4 (2.7 to 4.2)         | 5929                           | 214.4 (208.9 to 219.9)        | 1.6 (1.3 to 1.9)               |                                           |
| <b>Overall***</b> | <b>1084</b>    | <b>9.4 (7.3 to 11.5)</b> | <b>61157</b>                   | <b>439.2 (375.5 to 502.9)</b> | <b>2.1 (1.9 to 2.3)</b>        |                                           |
| Females           | Austria        | 30                       | 6.7 (4.5 to 9.6)               | 1235                          | 275.9 (260.7 to 291.8)         | 2.4 (1.7 to 3.3)                          |
|                   | Belgium        | 27                       | 4.7 (3.1 to 6.9)               | 1502                          | 263.7 (250.5 to 277.4)         | 1.8 (1.2 to 2.5)                          |
|                   | Croatia        | 18                       | 7.5 (4.4 to 12.0)              | 843                           | 354.9 (331.3 to 379.8)         | 2.1 (1.3 to 3.2)                          |
|                   | Cyprus         | 0                        | 0                              | 79                            | 231.6 (182.6 to 289.8)         | 0                                         |
|                   | Czech Republic | 40                       | 7.6 (5.4 to 10.4)              | 1220                          | 230.0 (217.2 to 243.3)         | 3.3 (2.5 to 4.3)                          |
|                   | Denmark        | 10                       | 3.6 (1.7 to 6.7)               | 531                           | 191.0 (175.1 to 208.0)         | 1.9 (1.0 to 3.2)                          |
|                   | Estonia        | 2                        | 2.6 (0.3 to 10.7)              | 100                           | 133.6 (108.6 to 162.9)         | 2.0 (0.3 to 6.6)                          |
|                   | Finland        | 42                       | 14.3 (10.3 to 19.4)            | 725                           | 248.6 (230.8 to 267.4)         | 5.8 (4.5 to 7.3)                          |
|                   | Germany        | 224                      | 4.6 (4.0 to 5.2)               | 9220                          | 192.5 (188.5 to 196.4)         | 2.4 (2.1 to 2.7)                          |
|                   | Ireland        | 3                        | 2.0 (0.4 to 5.7)               | 220                           | 127.7 (111.1 to 146.1)         | 1.5 (0.4 to 3.9)                          |
|                   | Italy          | 129                      | 3.5 (3.0 to 4.2)               | 8645                          | 241.0 (236.0 to 246.2)         | 1.5 (1.3 to 1.7)                          |
|                   | Latvia         | 2                        | 1.6 (0.2 to 6.9)               | 207                           | 174.1 (151.0 to 200.0)         | 0.9 (0.1 to 3.4)                          |
|                   | Lithuania      | 8                        | 4.6 (2.0 to 9.4)               | 344                           | 200.0 (179.3 to 222.6)         | 2.3 (1.1 to 4.2)                          |
|                   | Netherlands    | 23                       | 2.9 (1.8 to 4.4)               | 2333                          | 292.6 (280.9 to 304.8)         | 1.0 (0.7 to 1.4)                          |
|                   | Portugal       | 9                        | 1.5 (0.7 to 3.0)               | 817                           | 138.4 (129.1 to 148.3)         | 1.1 (0.5 to 2.0)                          |
|                   | Romania        | 25                       | 2.5 (1.6 to 3.7)               | 1163                          | 114.0 (107.5 to 120.8)         | 2.2 (1.5 to 3.0)                          |
|                   | Slovakia       | 10                       | 4.3 (2.0 to 7.9)               | 701                           | 291.0 (269.7 to 313.5)         | 1.5 (0.8 to 2.5)                          |
|                   | Slovenia       | 7                        | 6.5 (2.6 to 14.0)              | 369                           | 344.4 (310.1 to 381.7)         | 1.9 (0.8 to 3.7)                          |
|                   | Sweden         | 30                       | 5.8 (3.9 to 8.3)               | 1137                          | 226.7 (213.7 to 240.3)         | 2.6 (1.8 to 3.5)                          |
|                   | Switzerland    | 38                       | 9.5 (6.7 to 13.0)              | 1840                          | 457.6 (436.9 to 479.1)         | 2.1 (1.5 to 2.7)                          |
| Turkey            | 12             | 0.6 (0.3 to 1.1)         | 3170                           | 140.7 (135.4 to 146.1)        | 0.4 (0.2 to 0.8)               |                                           |
| United Kingdom    | 67             | 2.2 (1.7 to 2.8)         | 4724                           | 152.6 (148.2 to 157.0)        | 1.4 (1.1 to 1.8)               |                                           |
| <b>Overall***</b> | <b>755</b>     | <b>4.5 (3.4 to 5.6)</b>  | <b>41125</b>                   | <b>228.3 (194.4 to 262.1)</b> | <b>2.0 (1.7 to 2.1)</b>        |                                           |

TSCI: Traumatic Spinal Cord Injury; CI: Confidence Interval

\* We only included those cases where the cause of death has been defined by a specific ICD diagnostic code; cases where the cause was defined as "other and unspecified effects of external causes" or any of the ICD codes of T15-T78 and T80-T88 were excluded

\*\* Percent of age-standardized TSCI related mortality rate out of age-standardized all injury related mortality rate

\*\*\* Pooled age-standardized mortality rates estimated using the random effects model

**Figure S1. TSCI-related mortality rates by external cause in 22 European countries in 2012, by sex**

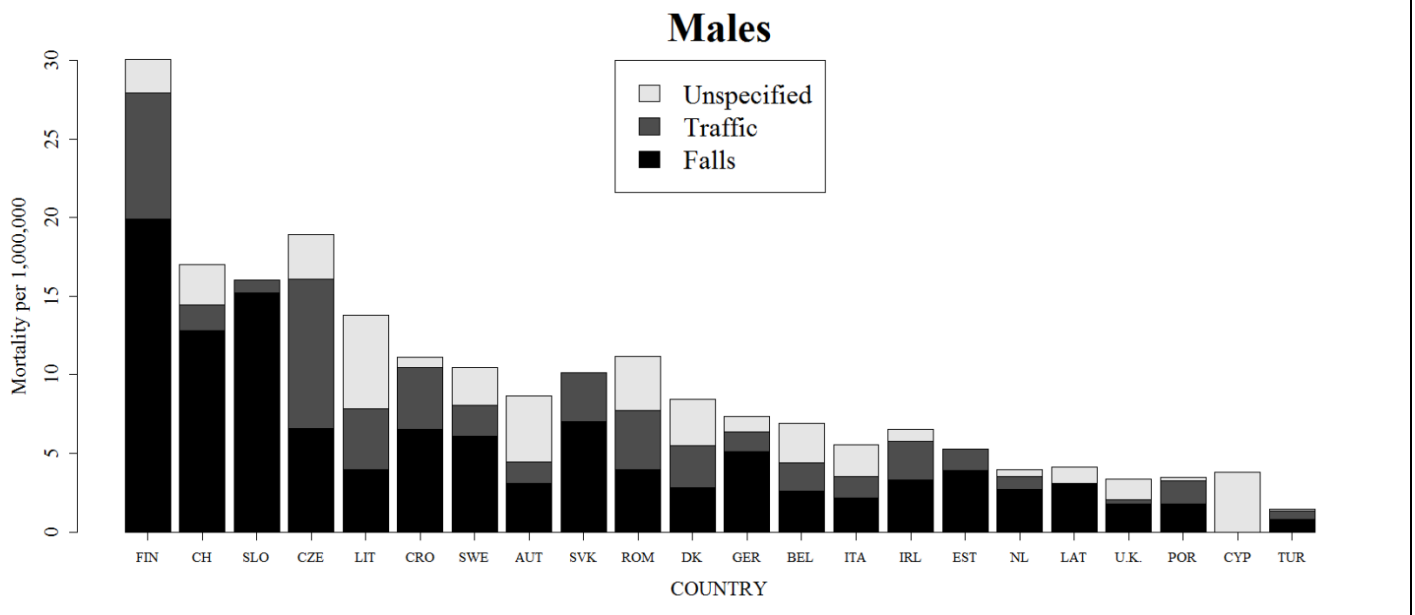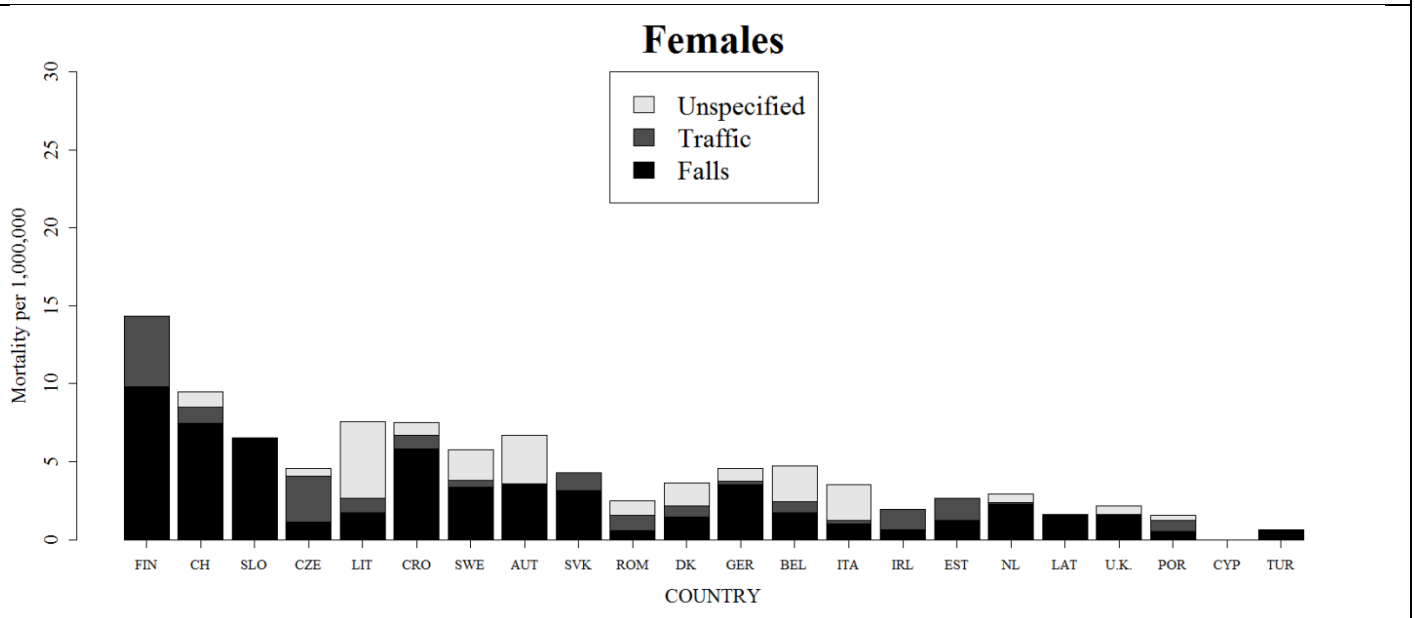

*TSCI: Traumatic Spinal Cord Injury*

Figure S2. TSCI-related mortality rates by level of injury, in 22 European countries in 2012, by sex

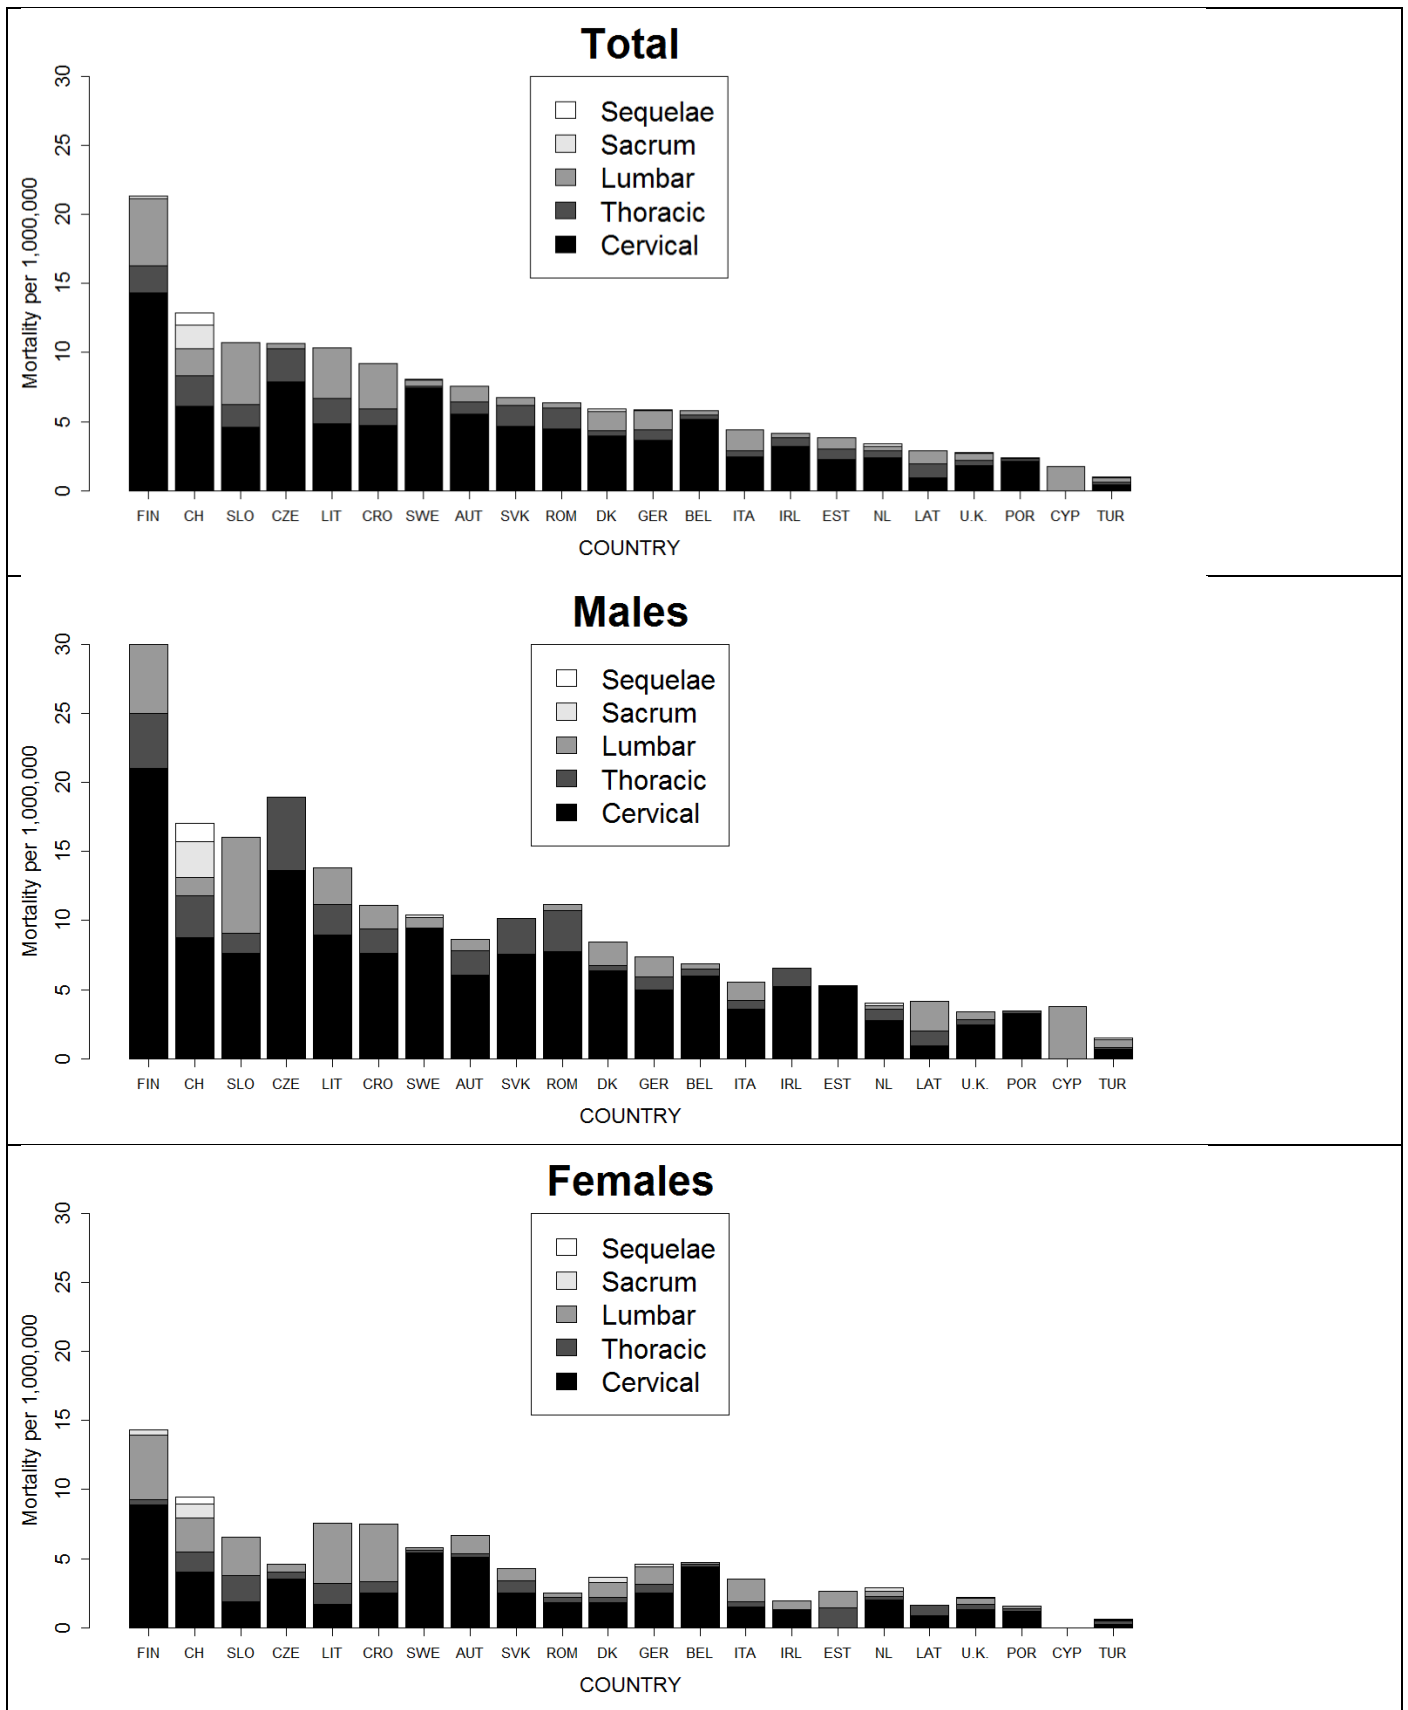

TSCI: Traumatic Spinal Cord Injury
